# Supplementary material for: Electrosynthesis of acetate from CO2by a highly structured biofilm assembled with reduced graphene oxide–tetraethylene pentamine
Source: Royal Society of Chemistry journal article supplement (doi:10.1039/c6ta02036d), 2016-01-01
Supplement: c6ta02036d1.pdf [file c6ta02036d1.pdf]

## Electronic Supplementary Information

### Electrosynthesis of acetate from CO<sub>2</sub> by a highly structured biofilm assembled with reduced graphene oxide–tetraethylene pentamine

Leifeng Chen,<sup>a</sup> Pier-Luc Tremblay,<sup>a</sup> Soumyaranjan Mohanty,<sup>b</sup> Kai Xu,<sup>c</sup> and Tian Zhang<sup>\*a</sup>

<sup>a</sup> *The Novo Nordisk Foundation Center for Biosustainability, Technical University of Denmark, DK-2970 Hørsholm, Denmark*

<sup>b</sup> *DTU Nanotech, Department of Micro- and Nanotechnology, Technical University of Denmark, DK-2800 Lyngby, Denmark.*

<sup>c</sup> *Center for Nuclear Technologies, Technical University of Denmark, Risø Campus, DK-4000 Roskilde, Denmark.*

\* Corresponding author

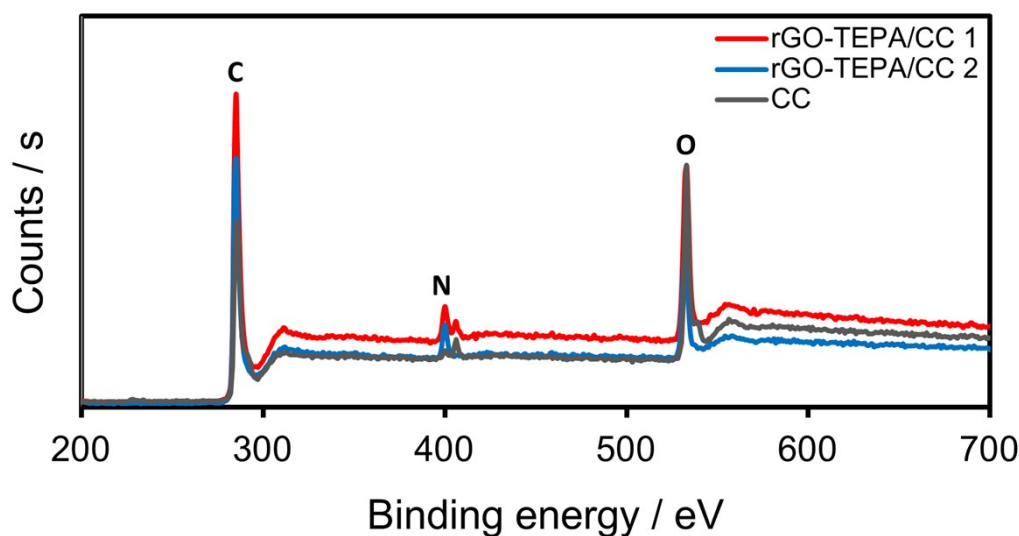

**Figure S1.** XPS survey spectra for rGO-TEPA-CC cathodes (duplicate) and unmodified CC cathode.
